# Supplementary material
Source: publisher figshare collection journal article supplement (https://gsapubs.figshare.com/articles/dataset/_/16959634)
Supplement: Supplementary file 1 [file 1]

## Sheet: s1_con1
ID	top_TWT	bottom_TWT	v_offset	length	fault	connected
1	3896	3906	24.9159	0	0	1
2	3892	3911	47.3483	116	0	1
3	3895	3903	19.919	104	0	1
4	3887	3917	74.7733	99	0	1
5	3878	3911	56.9638	103	0	1
6	3879	3903	59.593	106	0	1
7	3876	3895	47.0885	108	0	1
8	3903	3932	72.6649	115	0	1
9	3876	3918	72.5439	82	0	1
10	3880	3918	65.6671	89	0	1
11	3875	3918	106.973	90	0	1
12	3876	3920	109.517	112	0	1
13	3876	3919	107.01	107	0	1
14	3883	3919	89.6971	88	0	1

## Sheet: s1_con2
ID	top_TWT	bottom_TWT	v_offset	length	fault	connected
1	3873	3882	22.2436	100	0	1
2	3872	3881	22.2359	137	0	1
3	3872	3883	27.1866	127	0	1
4	3869	3884	37.0598	87	0	1
5	3871	3886	37.0855	86	0	1
6	3868	3883	37.047	118	0	1
7	3870	3881	27.1678	107	0	1
8	3871	3881	24.7023	107	0	1
9	3871	3879	19.755	99	0	1

## Sheet: s1_con3
ID	top_TWT	bottom_TWT	v_offset	length	fault	connected
1	3862	3873	27.0926	100	0	1
2	3856	3873	41.8268	84	0	1
3	3857	3873	39.3733	79	0	1
4	3855	3871	39.3459	102	0	1
5	3857	3868	27.0456	102	0	1

## Sheet: s1_con4
ID	top_TWT	bottom_TWT	v_offset	length	fault	connected
1	3866	3873	17.2527	0	0	1
2	3872	3881	22.2359	76	0	1
3	3874	3884	24.7279	92	0	1
4	3877	3884	17.3185	114	0	1

## Sheet: s1_con5
ID	top_TWT	bottom_TWT	v_offset	length	fault	connected
2	3920	3960	100.996	86	1	1
3	3929	3978	124.286	108	1	1
4	3930	3962	80.9611	128	1	1
5	3925	3946	52.9423	111	1	1
6	3921	3959	95.9465	103	1	1
7	3916	3955	98.3215	83	1	1
8	3915	3966	128.792	93	1	1
9	3915	3933	45.2023	112	1	1

## Sheet: s1_con5_2
ID	top_TWT	bottom_TWT	v_offset	length	fault	connected
24	3851	3889	93.6739	100	1	1
25	3855	3882	66.5231	127	1	1
26	3850	3875	61.4673	85	1	1
27	3843	3866	56.3927	80	1	1
28	3840	3864	58.7933	100	1	1
29	3838	3857	46.4717	100	1	1
30	3828	3850	53.6495	111	1	1
31	3825	3840	36.4959	93	1	1
32	3817	3819	4.84135	111	1	1
33	3811	3819	19.3449	91	1	1
34	3801	3811	24.1042	95	1	1
35	3787	3812	60.1217	121	1	1

## Sheet: s1_con6
ID	top_TWT	bottom_TWT	v_offset	length	fault	connected
1	3814	3814	0	0	0	1
2	3814	3819	12.097	81	0	1
3	3813	3818	12.0927	98	0	1
4	3814	3819	12.097	110	0	1
5	3817	3821	9.68611	91	0	1

## Sheet: s1_con7
ID	top_TWT	bottom_TWT	v_offset	length	fault	connected
1	3831	3831	0	0	0	1
2	3831	3837	14.6061	120	0	1
3	3833	3836	7.30431	78	0	1
4	3830	3838	19.4748	69	0	1
5	3830	3837	17.0374	115	0	1
6	3830	3838	19.4748	96	0	1
7	3833	3838	12.1781	85	0	1

## Sheet: s1_con8
ID	top_TWT	bottom_TWT	v_offset	length	fault	connected
1	3836	3841	12.1909	0	0	1
2	3837	3842	12.1952	108	0	1
3	3837	3846	21.9668	105	0	1
4	3837	3847	24.4118	96	0	1
5	3839	3846	17.0912	93	0	1
6	3839	3846	17.0912	93	0	1
7	3831	3839	19.4816	88	0	1
8	3834	3841	17.0613	82	0	1

## Sheet: s1_con9
ID	top_TWT	bottom_TWT	v_offset	length	fault	connected
1	3816	3819	7.26074	0	0	1
2	3810	3814	9.66219	85	0	1
3	3809	3817	19.3312	76	0	1
4	3810	3815	12.0799	85	0	1
5	3807	3813	14.483	87	0	1

[truncated: 61 more sheets: s1_con10, s1_con11, s1_con12, s1_con13, s1_con14, s1_con15, s1_con16, s1_con17, s1_con18, s1_con19, s1_con20, s1_con21, s1_con22, s1_con23, s1_con24, s1_con25, s1_con26, s1_con27, s1_con28, s1_con29 …]
