# Supplementary material
Source: publisher figshare collection journal article supplement (https://gsapubs.figshare.com/articles/dataset/_/16959634)

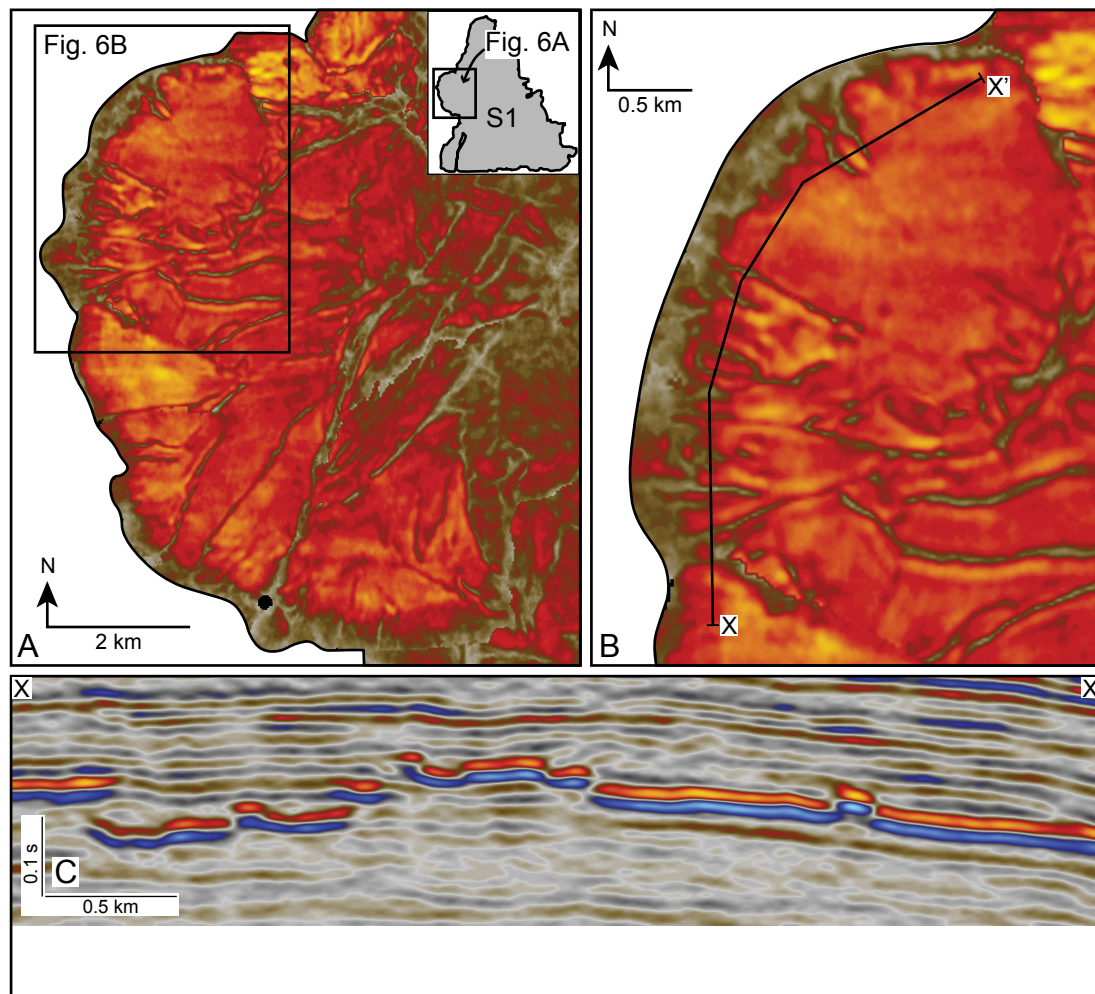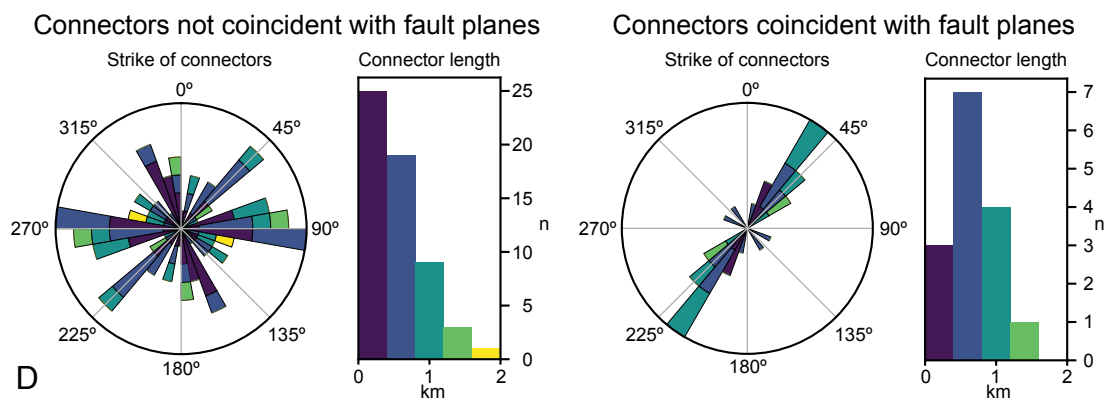

Supplement: Supplementary file 2 [file 1]

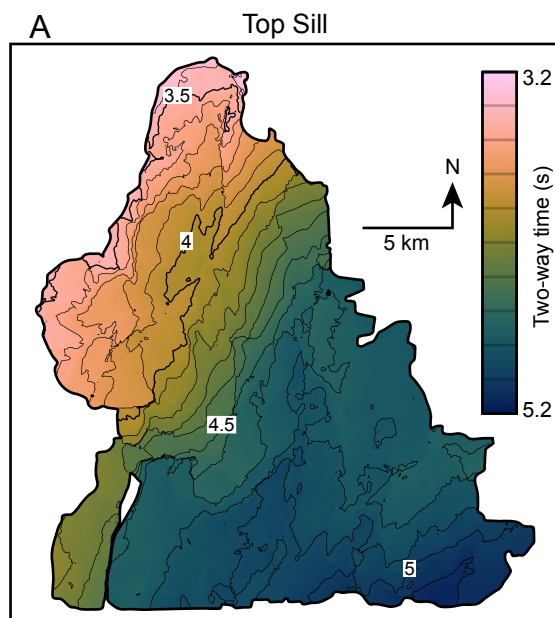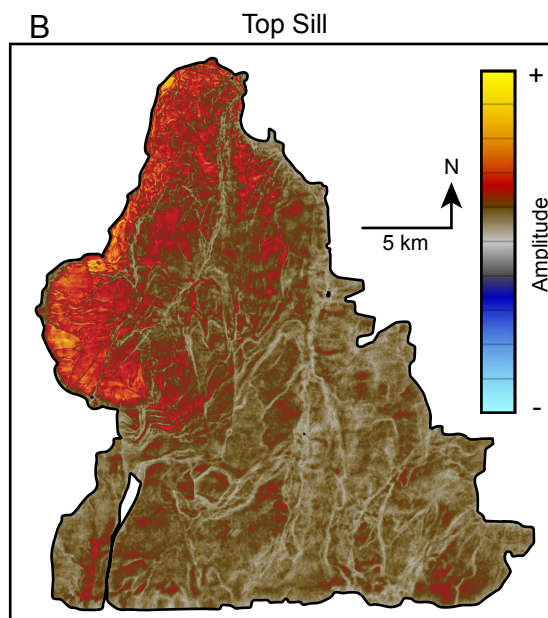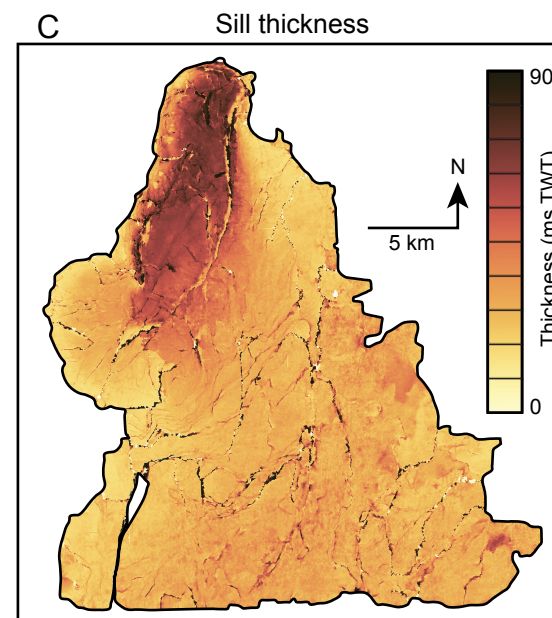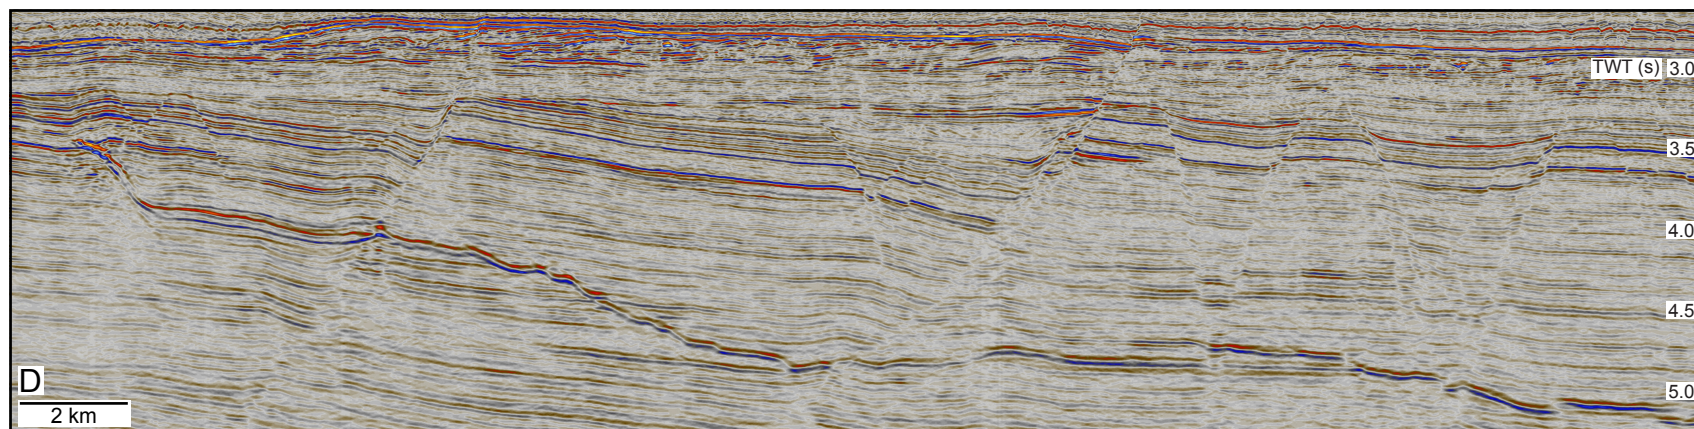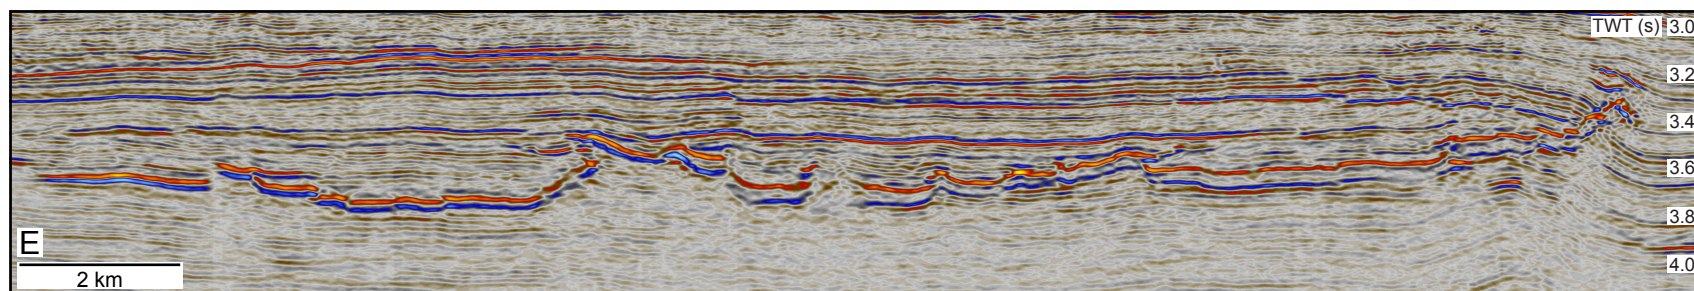

Supplement: Supplementary file 4 [file 1]

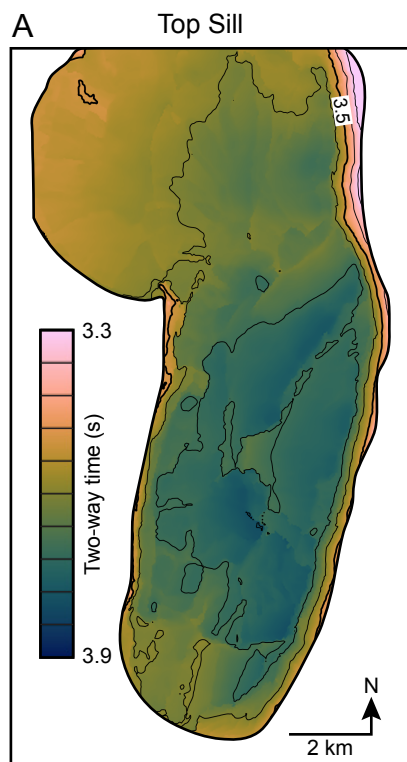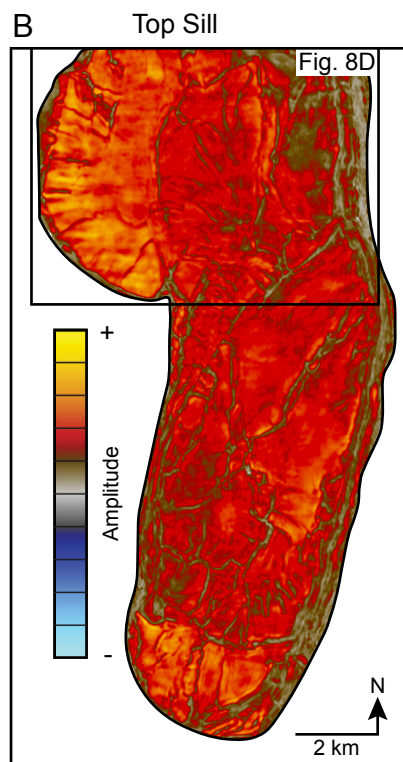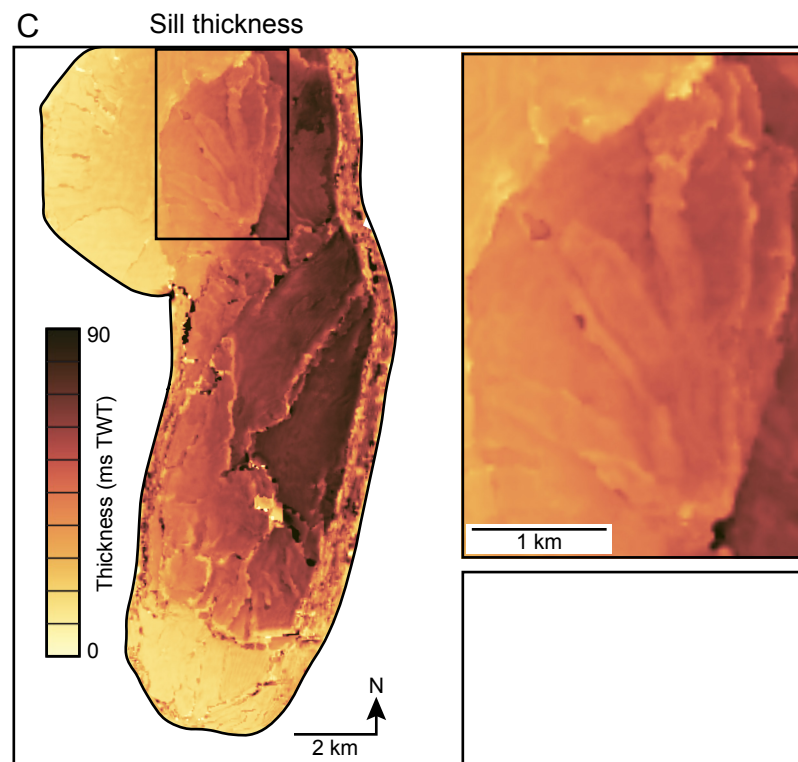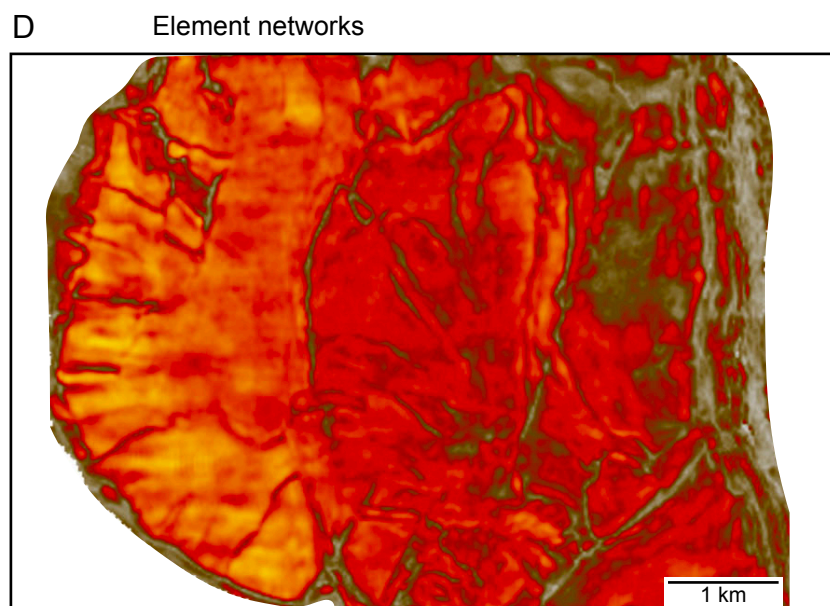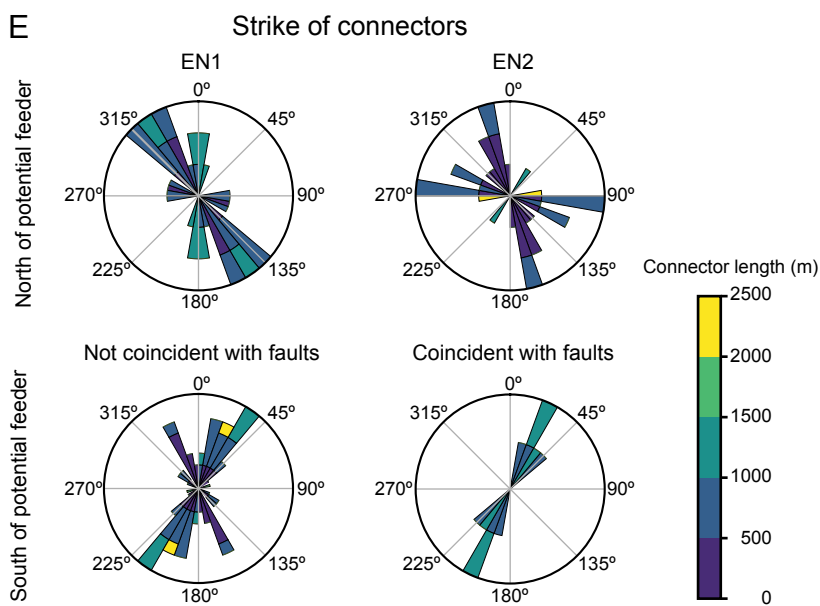

Supplement: Supplementary file 5 [file 1]
